# Supplementary material for: Parathyrsoidins A–D, Four New Sesquiterpenoids from the Soft Coral Paralemnalia thyrsoides
Source: MDPI journal article supplement (doi:10.3390/md11072501), 2013-07-12
Supplement: s3 [file s3]

marinedrugs-11-02501-s001.mol
  ChemDraw01201408382D

 18 20  0  0  0  0  0  0  0  0999 V2000
   -2.1431    1.0172    0.0000 C   0  0  0  0  0  0  0  0  0  0  0  0
   -2.1431    0.1922    0.0000 C   0  0  0  0  0  0  0  0  0  0  0  0
   -1.4286   -0.2203    0.0000 C   0  0  0  0  0  0  0  0  0  0  0  0
   -0.7142    0.1922    0.0000 C   0  0  0  0  0  0  0  0  0  0  0  0
   -0.7142    1.0172    0.0000 C   0  0  0  0  0  0  0  0  0  0  0  0
   -1.4286    1.4297    0.0000 C   0  0  0  0  0  0  0  0  0  0  0  0
    0.0003   -0.2203    0.0000 C   0  0  0  0  0  0  0  0  0  0  0  0
    0.7148    0.1922    0.0000 C   0  0  0  0  0  0  0  0  0  0  0  0
    0.7148    1.0172    0.0000 C   0  0  0  0  0  0  0  0  0  0  0  0
    0.0003    1.4297    0.0000 C   0  0  0  0  0  0  0  0  0  0  0  0
   -1.4286   -1.0453    0.0000 C   0  0  0  0  0  0  0  0  0  0  0  0
   -0.7142   -0.6328    0.0000 C   0  0  0  0  0  0  0  0  0  0  0  0
    0.2138   -1.0172    0.0000 C   0  0  0  0  0  0  0  0  0  0  0  0
    1.2982   -0.3912    0.0000 O   0  0  0  0  0  0  0  0  0  0  0  0
    1.0464   -1.0247    0.0000 C   0  0  0  0  0  0  0  0  0  0  0  0
   -0.5006   -1.4297    0.0000 C   0  0  0  0  0  0  0  0  0  0  0  0
    1.4286    0.6047    0.0000 O   0  0  0  0  0  0  0  0  0  0  0  0
    2.1431    0.1922    0.0000 C   0  0  0  0  0  0  0  0  0  0  0  0
  1  2  1  0      
  2  3  1  0      
  3  4  1  0      
  4  5  1  0      
  5  6  2  0      
  6  1  1  0      
  4  7  1  0      
  7  8  1  0      
  8  9  1  0      
  9 10  1  0      
 10  5  1  0      
  3 11  1  1      
  4 12  1  1      
  7 13  1  6      
  8 14  1  6      
 14 15  1  0      
 13 15  1  0      
 13 16  1  6      
  8 17  1  1      
 17 18  1  0      
M  STY  1   1 SUP
M  SLB  1   1   1
M  SAL   1  2  17  18
M  SBL   1  1  19
M  SMT   1 OMe
M  SBV   1 19   -6.8817    4.1316
M  END
