# Supplementary material for: Parathyrsoidins A–D, Four New Sesquiterpenoids from the Soft Coral Paralemnalia thyrsoides
Source: MDPI journal article supplement (doi:10.3390/md11072501), 2013-07-12
Supplement: s4 [file s4]

marinedrugs-11-02501-s002.mol
  corina  04141405593D 1   1.00000     0.00000 
CORINA 3.49 0023  12.04.2013
 21 23  0  0  0  0  0  0  0  0999 V2000
    0.0554    1.5568    0.0489 C   0  0  0  0  0  0  0  0  0  0  0  0
    0.0944    0.0254    0.0633 C   0  0  0  0  0  0  0  0  0  0  0  0
    0.8732   -0.4500   -1.1631 C   0  0  0  0  0  0  0  0  0  0  0  0
    2.3131    0.0322   -1.1055 C   0  0  0  0  0  0  0  0  0  0  0  0
    2.4481    1.4016   -0.5139 C   0  0  0  0  0  0  0  0  0  0  0  0
    1.4635    2.0792   -0.0029 C   0  0  0  0  0  0  0  0  0  0  0  0
    2.9741   -0.0616   -2.4583 C   0  0  0  0  0  0  0  0  0  0  0  0
    4.3730    0.5805   -2.5132 C   0  0  0  0  0  0  0  0  0  0  0  0
    4.3406    2.0082   -1.9609 C   0  0  0  0  0  0  0  0  0  0  0  0
    3.8347    2.0236   -0.5199 C   0  0  0  0  0  0  0  0  0  0  0  0
    0.8554   -1.9791   -1.2097 C   0  0  0  0  0  0  0  0  0  0  0  0
    3.0696   -0.9287   -0.1861 C   0  0  0  0  0  0  0  0  0  0  0  0
    2.2098    0.6983   -3.5564 C   0  0  0  0  0  0  0  0  0  0  0  0
    4.5796    0.7158   -3.9489 O   0  0  0  0  0  0  0  0  0  0  0  0
    3.3350    1.1992   -4.4898 C   0  0  0  0  0  0  0  0  0  0  0  0
    1.4385    1.8773   -2.9599 C   0  0  0  0  0  0  0  0  0  0  0  0
    1.5367    0.0279   -4.0908 H   0  0  0  0  0  0  0  0  0  0  0  0
    5.3667   -0.2244   -1.8755 O   0  0  0  0  0  0  0  0  0  0  0  0
    6.6793    0.3397   -1.9064 C   0  0  0  0  0  0  0  0  0  0  0  0
    3.1422    0.6795   -5.8070 O   0  0  0  0  0  0  0  0  0  0  0  0
    4.0851    1.1624   -6.7661 C   0  0  0  0  0  0  0  0  0  0  0  0
  1  2  1  0      
  2  3  1  0      
  3  4  1  0      
  4  5  1  0      
  5  6  2  0      
  6  1  1  0      
  4  7  1  0      
  7  8  1  0      
  8  9  1  0      
  9 10  1  0      
 10  5  1  0      
  3 11  1  0      
  4 12  1  0      
  7 13  1  0      
  8 14  1  0      
 14 15  1  0      
 13 15  1  0      
 13 16  1  0      
 13 17  1  0      
  8 18  1  0      
 18 19  1  0      
 15 20  1  0      
 20 21  1  0      
M  STY  1   1 SUP
M  SLB  1   1   1
M  SAL   1  2  18  19
M  SBL   1  1  20
M  SMT   1 OMe
M  SBV   1 20   -7.7973    6.0769
M  STY  1   2 SUP
M  SLB  1   2   2
M  SAL   2  2  20  21
M  SBL   2  1  22
M  SMT   2 OMe
M  SBV   2 22   -7.9476    5.5142
M  END
$$$$
