# Supplementary material for: Parathyrsoidins A–D, Four New Sesquiterpenoids from the Soft Coral Paralemnalia thyrsoides
Source: MDPI journal article supplement (doi:10.3390/md11072501), 2013-07-12
Supplement: s5 [file s5]

marinedrugs-11-02501-s002.mol
  ChemDraw01201408392D

 21 23  0  0  0  0  0  0  0  0999 V2000
   -2.2337    1.2094    0.0000 C   0  0  0  0  0  0  0  0  0  0  0  0
   -2.2337    0.3844    0.0000 C   0  0  0  0  0  0  0  0  0  0  0  0
   -1.5192   -0.0281    0.0000 C   0  0  0  0  0  0  0  0  0  0  0  0
   -0.8048    0.3844    0.0000 C   0  0  0  0  0  0  0  0  0  0  0  0
   -0.8048    1.2094    0.0000 C   0  0  0  0  0  0  0  0  0  0  0  0
   -1.5192    1.6219    0.0000 C   0  0  0  0  0  0  0  0  0  0  0  0
   -0.0903   -0.0281    0.0000 C   0  0  0  0  0  0  0  0  0  0  0  0
    0.6242    0.3844    0.0000 C   0  0  0  0  0  0  0  0  0  0  0  0
    0.6242    1.2094    0.0000 C   0  0  0  0  0  0  0  0  0  0  0  0
   -0.0903    1.6219    0.0000 C   0  0  0  0  0  0  0  0  0  0  0  0
   -1.5192   -0.8531    0.0000 C   0  0  0  0  0  0  0  0  0  0  0  0
   -0.8048   -0.4406    0.0000 C   0  0  0  0  0  0  0  0  0  0  0  0
    0.1232   -0.8250    0.0000 C   0  0  0  0  0  0  0  0  0  0  0  0
    1.2075   -0.1990    0.0000 O   0  0  0  0  0  0  0  0  0  0  0  0
    0.9558   -0.8325    0.0000 C   0  0  0  0  0  0  0  0  0  0  0  0
   -0.5912   -1.2375    0.0000 C   0  0  0  0  0  0  0  0  0  0  0  0
   -0.0903   -1.6219    0.0000 H   0  0  0  0  0  0  0  0  0  0  0  0
    1.3380    0.7969    0.0000 O   0  0  0  0  0  0  0  0  0  0  0  0
    2.0525    0.3844    0.0000 C   0  0  0  0  0  0  0  0  0  0  0  0
    1.5192   -0.9826    0.0000 O   0  0  0  0  0  0  0  0  0  0  0  0
    2.2337   -1.3951    0.0000 C   0  0  0  0  0  0  0  0  0  0  0  0
  1  2  1  0      
  2  3  1  0      
  3  4  1  0      
  4  5  1  0      
  5  6  2  0      
  6  1  1  0      
  4  7  1  0      
  7  8  1  0      
  8  9  1  0      
  9 10  1  0      
 10  5  1  0      
  3 11  1  1      
  4 12  1  1      
  7 13  1  6      
  8 14  1  6      
 14 15  1  0      
 13 15  1  0      
 13 16  1  6      
 13 17  1  1      
  8 18  1  1      
 18 19  1  0      
 15 20  1  1      
 20 21  1  0      
M  STY  1   1 SUP
M  SLB  1   1   1
M  SAL   1  2  18  19
M  SBL   1  1  20
M  SMT   1 OMe
M  SBV   1 20   -7.7973    6.0769
M  STY  1   2 SUP
M  SLB  1   2   2
M  SAL   2  2  20  21
M  SBL   2  1  22
M  SMT   2 OMe
M  SBV   2 22   -7.9476    5.5142
M  END
