# Supplementary material for: Parathyrsoidins A–D, Four New Sesquiterpenoids from the Soft Coral Paralemnalia thyrsoides
Source: MDPI journal article supplement (doi:10.3390/md11072501), 2013-07-12
Supplement: s6 [file s6]

marinedrugs-11-02501-s003.mol
  corina  04141405593D 1   1.00000     0.00000 
CORINA 3.49 0023  12.04.2013
 18 20  0  0  0  0  0  0  0  0999 V2000
   -0.0187    1.5289    0.0104 C   0  0  0  0  0  0  0  0  0  0  0  0
    0.0021   -0.0041    0.0020 C   0  0  0  0  0  0  0  0  0  0  0  0
    0.8870   -0.5282    1.1614 C   0  0  0  0  0  0  0  0  0  0  0  0
    2.2644    0.0308    1.1592 C   0  0  0  0  0  0  0  0  0  0  0  0
    2.4125    1.3388    0.4639 C   0  0  0  0  0  0  0  0  0  0  0  0
    1.4041    2.0330   -0.0004 C   0  0  0  0  0  0  0  0  0  0  0  0
    3.2639   -0.8591    0.6188 C   0  0  0  0  0  0  0  0  0  0  0  0
    4.3285   -0.4923   -0.1112 C   0  0  0  0  0  0  0  0  0  0  0  0
    4.6008    0.9427   -0.4881 C   0  0  0  0  0  0  0  0  0  0  0  0
    3.7709    1.8978    0.4118 C   0  0  0  0  0  0  0  0  0  0  0  0
    0.1446   -0.1502    2.4931 C   0  0  0  0  0  0  0  0  0  0  0  0
    2.6353    0.2100    2.6622 C   0  0  0  0  0  0  0  0  0  0  0  0
    3.3287   -2.4038    0.6957 C   0  0  0  0  0  0  0  0  0  0  0  0
    5.1314   -1.5440   -0.3995 O   0  0  0  0  0  0  0  0  0  0  0  0
    4.9168   -2.6781    0.5043 C   0  0  0  0  0  0  0  0  0  0  0  0
    2.5919   -3.0523   -0.3430 C   0  0  0  0  0  0  0  0  0  0  0  0
    5.5756   -2.5203    1.7267 O   0  0  0  0  0  0  0  0  0  0  0  0
    7.0009   -2.5359    1.6251 C   0  0  0  0  0  0  0  0  0  0  0  0
  1  2  1  0      
  2  3  1  0      
  3  4  1  0      
  4  5  1  0      
  5  6  2  0      
  6  1  1  0      
  4  7  1  0      
  7  8  2  0      
  8  9  1  0      
  9 10  1  0      
 10  5  1  0      
  3 11  1  0      
  4 12  1  0      
 14 15  1  0      
 13 15  1  0      
  7 13  1  0      
  8 14  1  0      
 13 16  1  0      
 15 17  1  0      
 17 18  1  0      
M  STY  1   1 SUP
M  SLB  1   1   1
M  SAL   1  2  17  18
M  SBL   1  1  19
M  SMT   1 OMe
M  SBV   1 19   -7.8651    5.0156
M  END
$$$$
