# Supplementary material for: Parathyrsoidins A–D, Four New Sesquiterpenoids from the Soft Coral Paralemnalia thyrsoides
Source: MDPI journal article supplement (doi:10.3390/md11072501), 2013-07-12
Supplement: s7 [file s7]

marinedrugs-11-02501-s003.mol
  ChemDraw01201408392D

 18 20  0  0  0  0  0  0  0  0999 V2000
   -2.2337    1.1026    0.0000 C   0  0  0  0  0  0  0  0  0  0  0  0
   -2.2337    0.2776    0.0000 C   0  0  0  0  0  0  0  0  0  0  0  0
   -1.5192   -0.1349    0.0000 C   0  0  0  0  0  0  0  0  0  0  0  0
   -0.8048    0.2776    0.0000 C   0  0  0  0  0  0  0  0  0  0  0  0
   -0.8048    1.1026    0.0000 C   0  0  0  0  0  0  0  0  0  0  0  0
   -1.5192    1.5151    0.0000 C   0  0  0  0  0  0  0  0  0  0  0  0
   -0.0903   -0.1349    0.0000 C   0  0  0  0  0  0  0  0  0  0  0  0
    0.6242    0.2776    0.0000 C   0  0  0  0  0  0  0  0  0  0  0  0
    0.6242    1.1026    0.0000 C   0  0  0  0  0  0  0  0  0  0  0  0
   -0.0903    1.5151    0.0000 C   0  0  0  0  0  0  0  0  0  0  0  0
   -1.5192   -0.9599    0.0000 C   0  0  0  0  0  0  0  0  0  0  0  0
   -0.8048   -0.5474    0.0000 C   0  0  0  0  0  0  0  0  0  0  0  0
    0.1232   -0.9318    0.0000 C   0  0  0  0  0  0  0  0  0  0  0  0
    1.2075   -0.3057    0.0000 O   0  0  0  0  0  0  0  0  0  0  0  0
    0.9558   -0.9392    0.0000 C   0  0  0  0  0  0  0  0  0  0  0  0
   -0.4601   -1.5151    0.0000 C   0  0  0  0  0  0  0  0  0  0  0  0
    1.5192   -1.0894    0.0000 O   0  0  0  0  0  0  0  0  0  0  0  0
    2.2337   -1.5019    0.0000 C   0  0  0  0  0  0  0  0  0  0  0  0
  1  2  1  0      
  2  3  1  0      
  3  4  1  0      
  4  5  1  0      
  5  6  2  0      
  6  1  1  0      
  4  7  1  0      
  7  8  2  0      
  8  9  1  0      
  9 10  1  0      
 10  5  1  0      
  3 11  1  1      
  4 12  1  1      
 14 15  1  0      
 13 15  1  0      
  7 13  1  0      
  8 14  1  0      
 13 16  1  6      
 15 17  1  1      
 17 18  1  0      
M  STY  1   1 SUP
M  SLB  1   1   1
M  SAL   1  2  17  18
M  SBL   1  1  19
M  SMT   1 OMe
M  SBV   1 19   -7.8651    5.0156
M  END
